# Supplementary material for: Quality-controlled meteorological datasets from SIGMA automatic weather stations in northwest Greenland, 2012–2020
Source: Copernicus journal article supplement (doi:10.5194/essd-15-5207-2023), 2023-11-28
Supplement: Supplementary file 1 [file essd-15-5207-2023-supplement.pdf]

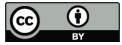

*Supplement of*

## **Quality-controlled meteorological datasets from SIGMA automatic weather stations in northwest Greenland, 2012–2020**

**Motoshi Nishimura et al.**

*Correspondence to:* Motoshi Nishimura ([nishimura.motoshi@nipr.ac.jp](mailto:nishimura.motoshi@nipr.ac.jp))

The copyright of individual parts of the supplement might differ from the article licence.

1 **Supplementary materials**

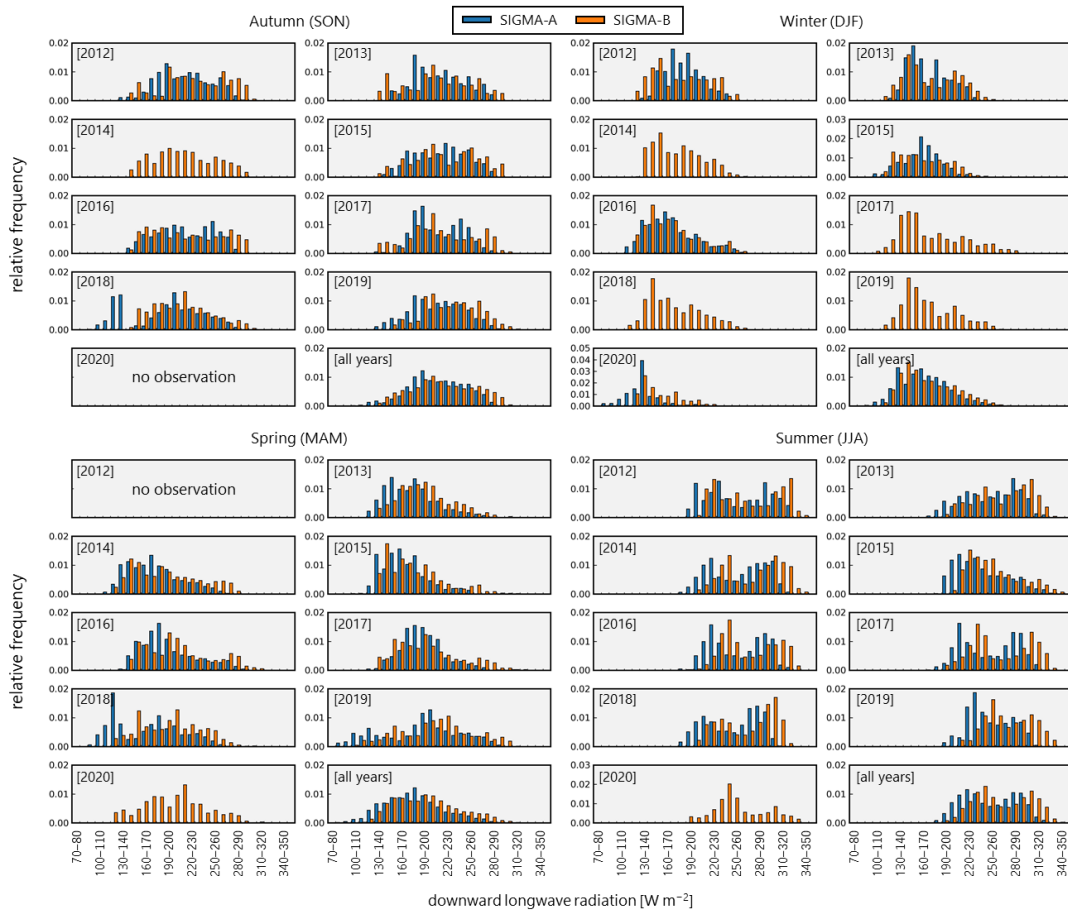

2

3 **Figure S1.** Histograms of downward longwave radiation ( $LW_d$ ) in each season and year at the SIGMA-  
 4 A (blue) and SIGMA-B (orange) sites. If more than half of the observation data were masked, the data  
 5 were not plotted.

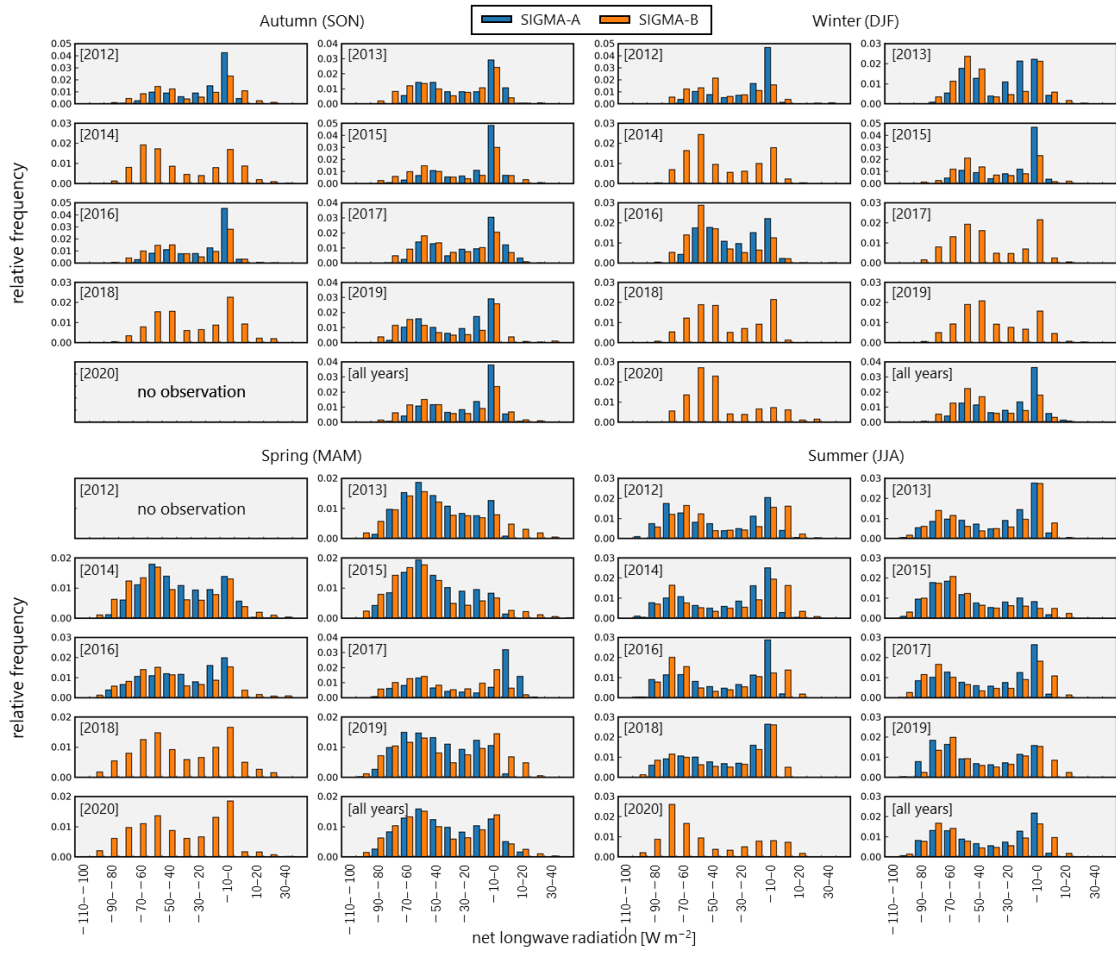

6  
 7 Figure S2. Histograms of net longwave radiation ( $LW_{net}$ ) in each season and year at the SIGMA-A  
 8 (blue) and SIGMA-B (orange) sites.
